# Supplementary material for: Insights into ozone pollution control in urban areas by decoupling meteorological factors based on machine learning
Source: Copernicus journal article supplement (doi:10.5194/acp-25-1749-2025), 2025-02-07
Supplement: Supplementary file 1 [file acp-25-1749-2025-supplement.pdf]

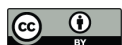

*Supplement of*

## **Insights into ozone pollution control in urban areas by decoupling meteorological factors based on machine learning**

**Yuqing Qiu et al.**

*Correspondence to:* Xin Li (li\_xin@pku.edu.cn) and Wenxuan Chai (chaiwx@cnemc.cn)

The copyright of individual parts of the supplement might differ from the article licence.

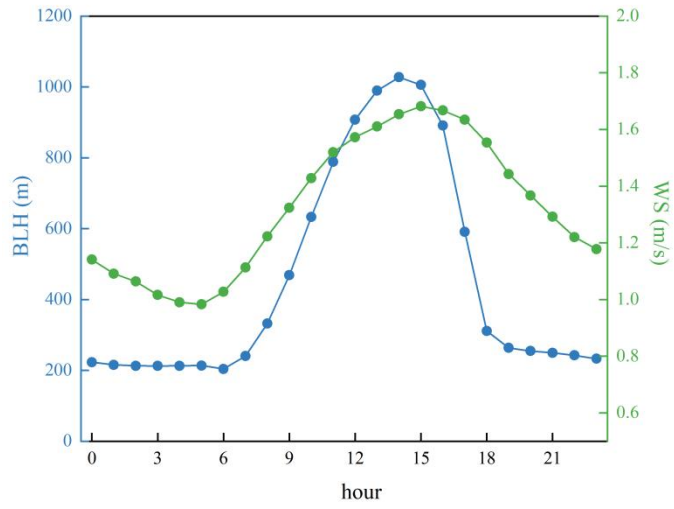

Figure S1: Mean diurnal variations of WS and BLH.

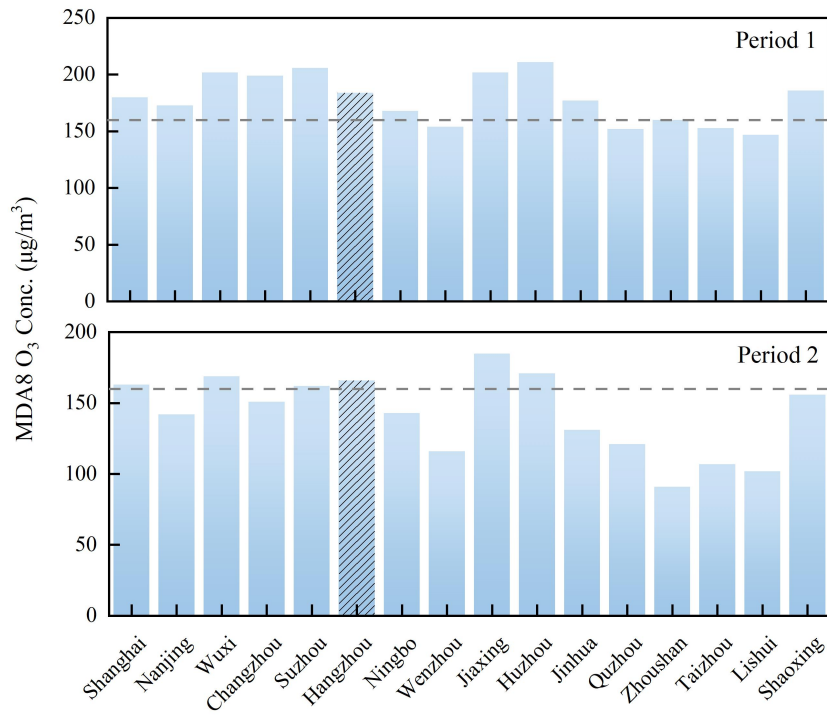

Figure S2: The MDA8 O<sub>3</sub> concentration in Hangzhou and surrounding cities in the Period 1 and Period 2.

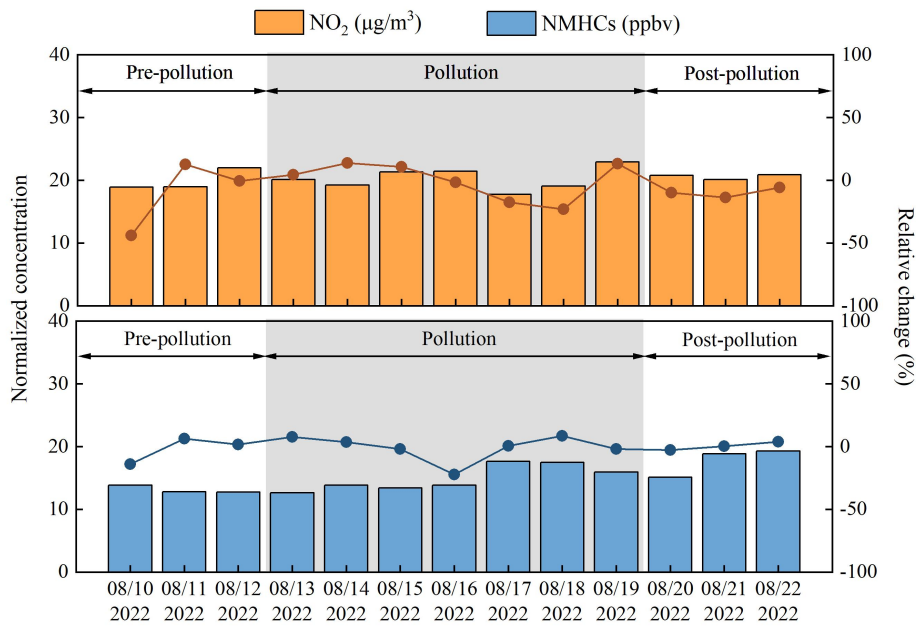

**Figure S3: Variation of the normalized concentrations of precursors and relative contribution of dispersion in the Period 2. The histogram represented the NO<sub>2</sub> and NMHCs concentrations after meteorological normalization, and the dot plot represented the relative change caused by dispersion.**

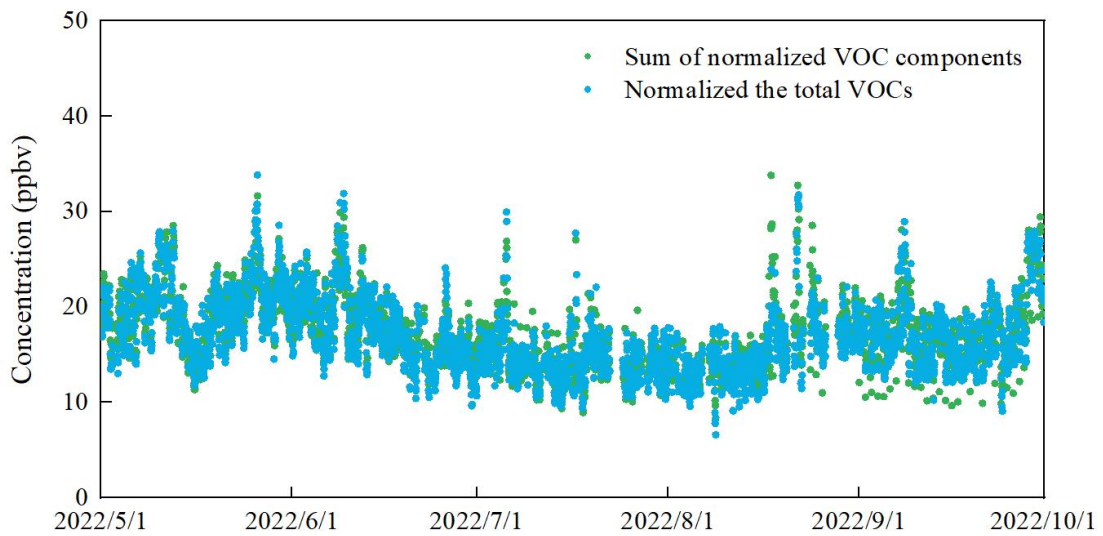

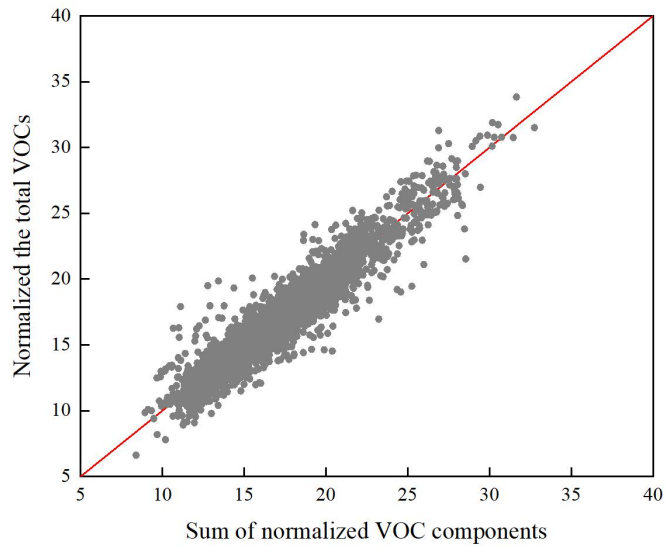

**Figure S4: Time series and correlation of the sum of normalized VOC species and normalized total VOCs.**

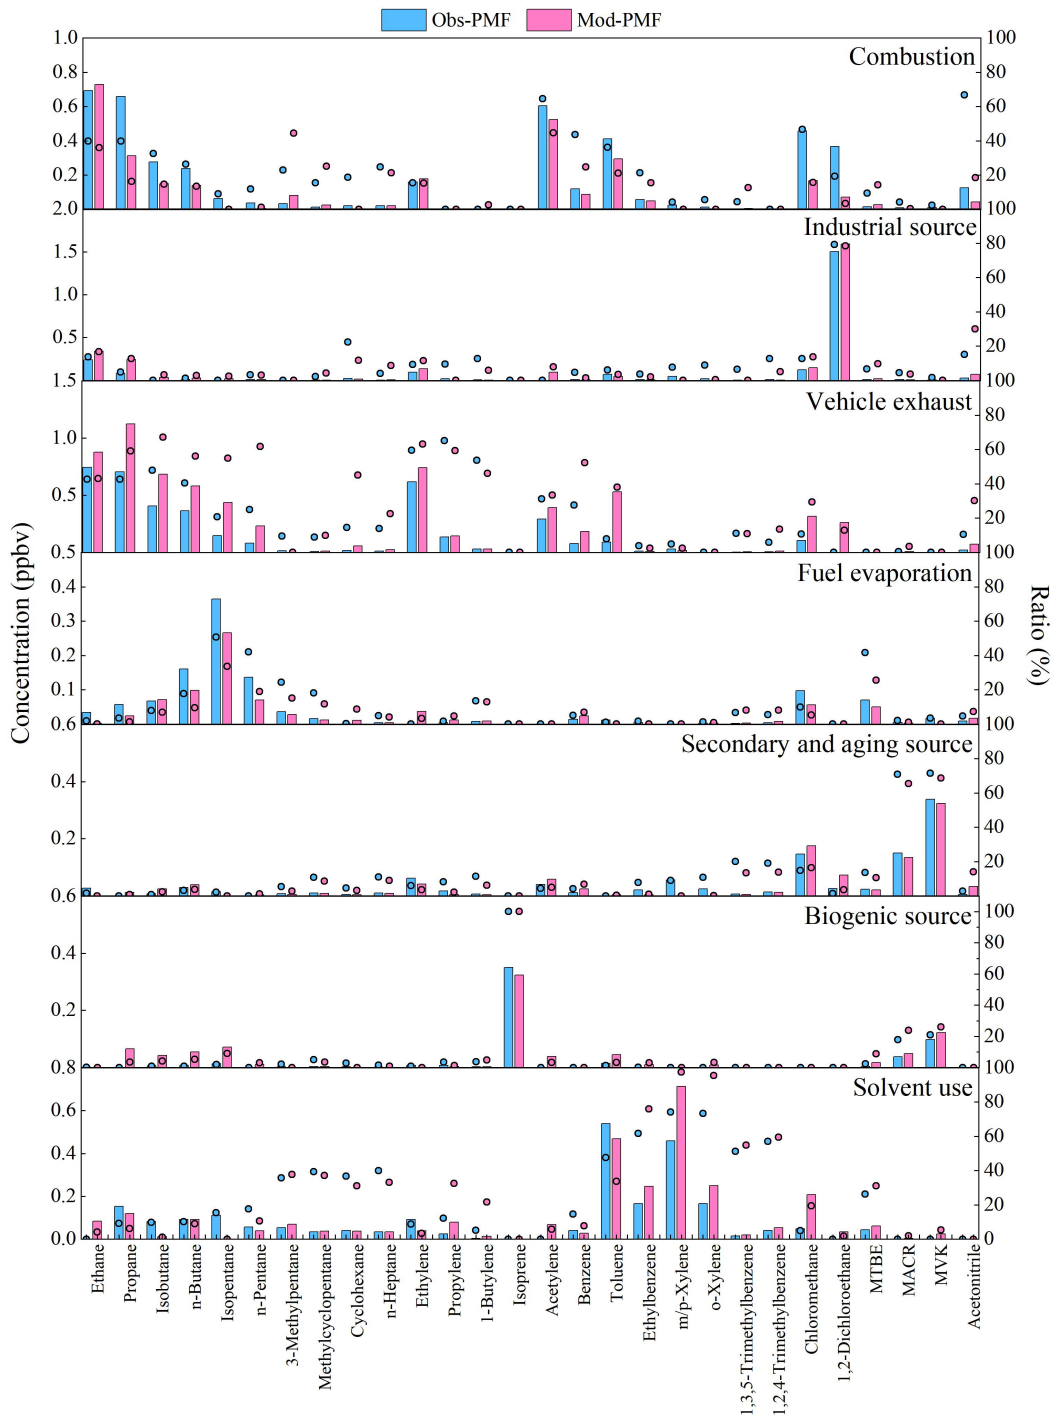

**Figure S5: Source profiles and contributions of VOCs based on observed and normalized concentrations from May to September in 2022 . Bars represented the concentration of each species apportioned to the factor, dots represented the percent of each species apportioned to the factor.**

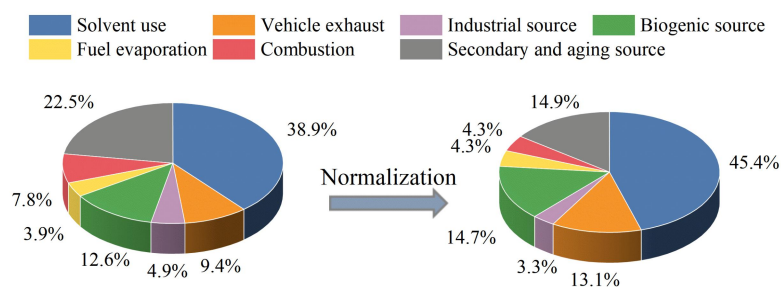

**Figure S6: Contribution of emission sources to OFP before and after meteorological normalization during the pollution periods in the Period 2.**

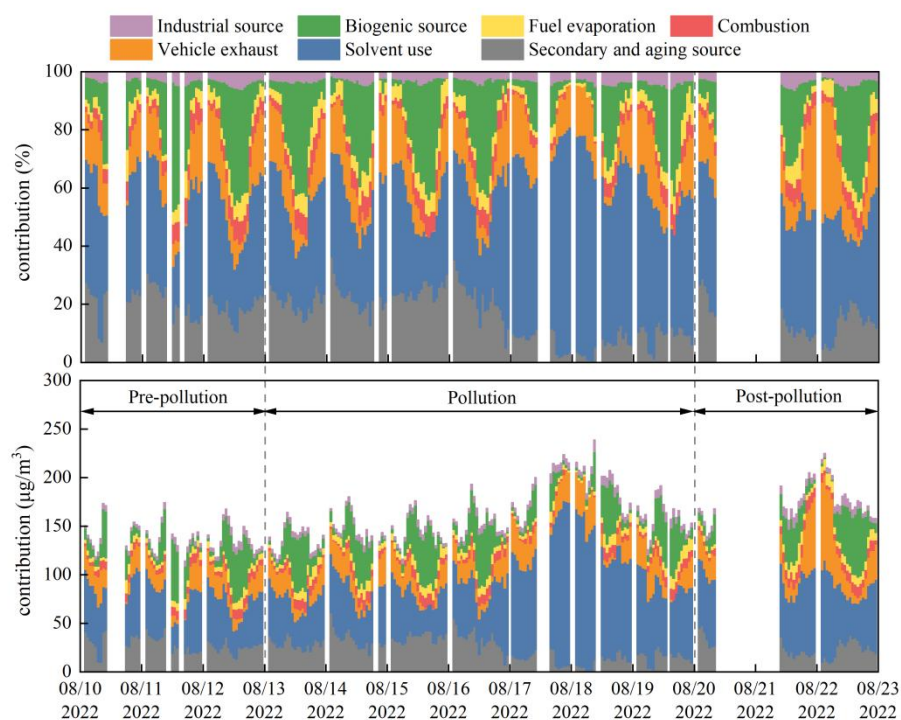

**Figure S7: Temporal variation of emission sources contributions to OFP after meteorological normalization in the Period 2.**

**Table S1. The list of VOC species in this study.**

| Species name       | Species name    | Species name             |
|--------------------|-----------------|--------------------------|
| Alkanes            | cis-2-Butene    | Dichloromethane          |
| Ethane             | 1,3-Butadiene   | 1,1-Dichloroethane       |
| Propane            | 1-Pentene       | cis-1,2-Dichloroethylene |
| Isobutane          | trans-2-Pentene | Chloroform               |
| n-Butane           | cis-2-Pentene   | 1,1,1-Trichloroethane    |
| Isopentane         | 1-Hexene        | Tetrachloromethane       |
| n-Pentane          | Isoprene        | 1,2-Dichloroethane       |
| cyclopentane       | Alkyne          | Trichloroethylene        |
| 2,2-Dimethylbutane | Acetylene       | 1,2-Dichloropropane      |

|                        |                         |                           |
|------------------------|-------------------------|---------------------------|
| 2,3-Dimethylbutane     | <b>Aromatics</b>        | Bromodichloromethane      |
| 2-Methylpentane        | Benzene                 | trans-1,3-Dichloropropene |
| 3-Methylpentane        | Toluene                 | cis-1,3-Dichloropropene   |
| n-Hexane               | Ethylbenzene            | 1,1,2-Trichloroethane     |
| Cyclohexane            | m,p-Xylene              | Tetrachloroethylene       |
| Methylcyclopentane     | o-Xylene                | 1,2-Dibromoethane         |
| 2,3-Dimethylpentane    | Styrene                 | Chlorobenzene             |
| 2,4-Dimethylpentane    | Isopropylbenzene        | 1,3-Dichlorobenzene       |
| 2-Methylhexane         | n-Propylbenzene         | 1,4-Dichlorobenzene       |
| 3-Methylhexane         | 2-Ethyltoluene          | Benzylchloride            |
| n-Heptane              | 3-Ethyltoluene          | 1,2-Dichlorobenzene       |
| Methylcyclohexane      | 4-Ethyltoluene          | <b>OVOCs</b>              |
| 2,2,4-Trimethylpentane | 1,3,5-Trimethylbenzene  | Acrolein                  |
| 2,3,4-Trimethylpentane | 1,2,4-Trimethylbenzene  | Acetone                   |
| 2-Methylheptane        | 1,2,3-Trimethylbenzene  | Propanal                  |
| 3-Methylheptane        | 1,3-Diethylbenzene      | Methacrolein              |
| Octane                 | 1,4-Diethylbenzene      | Methylethylketone         |
| n-Nonane               | <b>Halohydrocarbons</b> | n-Butanal                 |
| n-Decane               | Freon114                | n-Pentanal                |
| Undecane               | Chloromethane           | n-Hexanal                 |
| Dodecane               | VinylChloride           | MTBE                      |
| <b>Alkenes</b>         | Bromomethane            | Methylvinylketone         |
| Ethylene               | Chloroethane            | 2-Pentanone               |
| Propene                | Freon11                 | 3-Pentanone               |
| 1-Butene               | 1,1-Dichloroethylene    | <b>Others</b>             |
| trans-2-Butene         | Freon113                | Acetonitrile              |

**Table S2. RF model performance for testing data set .**

| <b>Pollutants</b> | <b>r<sup>2</sup></b> | <b>RMSE</b> | <b>FAC2</b> | <b>MB</b> | <b>MGE</b> | <b>NMB</b> | <b>NMGE</b> | <b>COE</b> | <b>IOA</b> |
|-------------------|----------------------|-------------|-------------|-----------|------------|------------|-------------|------------|------------|
| O <sub>3</sub>    | 0.88                 | 17.33       | 0.80        | -0.34     | 12.70      | -0.01      | 0.22        | 0.68       | 0.84       |
| NO <sub>2</sub>   | 0.83                 | 9.43        | 0.97        | 0.11      | 6.85       | 0.00       | 0.18        | 0.62       | 0.81       |
| NMHCs             | 0.76                 | 6.41        | 0.99        | -0.11     | 4.60       | 0.00       | 0.20        | 0.54       | 0.77       |
